# Supplementary material for: The Relationship between Personality Types, Coping, and Gender in Academic Stress
Source: Preprints.org preprint supplement (doi:10.20944/preprints202307.1426.v1), 2023-07-20
Supplement: Supplementary file 2 [file supplementary]

**Supplementary Material**

**Table S1.** Reliability Indexes of Internal Consistency, Cronbach’s α, and McDonald’s ω for the Coping Strategies Inventory (CSI) and the NEO-FFI.

| Scale | Dimension | ω | 95% CI | α | 95% CI |
| --- | --- | --- | --- | --- | --- |
| NEO-FFI | Neuroticism | .90 | [.89 - .91] | .89 | [.88 - .90] |
| Extraversion | .90 | [.89 - .91] | .90 | [.89 - .91] |
| Openness | .79 | [.77 - .81] | .79 | [.76 - .81] |
| Agreeableness | .74 | [.71 - .77] | .73 | [.71 - .76] |
| Conscientiousness | .88 | [.87 - .90] | .88 | [.87 - .89] |
| CSI | Problem-Solving | .88 | [.87 - .90] | .88 | [.87 - .90] |
|  | Self-Criticism | .91 | [.90 - .92] | .91 | [.90 - .92] |
|  | Emotional Expression | .87 | [.85 - .88] | .86 | [.84 - .87] |
|  | Wishful Thinking | .84 | [.82 - .86] | .83 | [.81 - .85] |
|  | Social Support | .81 | [.78 - .83] | .80 | [.78 - .83] |
|  | Cognitive Restructuring | .85 | [.83 - .87] | .85 | [.83 - .86] |
|  | Problem Avoidance | .72 | [.69 - .75] | .71 | [.68 - .74] |
|  | Social Withdrawal | .78 | [.75 - .80] | .78 | [.75 - .80] |
